# Supplementary material
Source: Research Square preprint supplement (doi:10.21203/rs.3.rs-9656420/v1)
Supplement: Supplementary file 1 [file c3fa3d4a61bf28106a09fd6e.docx]

**SUPPLEMENTARY INFORMATION**

**Microbial communities and nutrient-cycling potential in epilithic biofilms differ between light- and dark-exposed sides of cobbles in a Mediterranean river**

David Pineda-Morante1* · Giulia Gionchetta2 · María Argudo1 · Anna M. Romaní3 · Eugènia Martí1 · Helena Guasch1

1Integrative Freshwater Ecology Group, Centre d’Estudis Avançats de Blanes (CEAB-CSIC), Blanes, Spain

2Institute of Environmental Assessment and Water Research (IDAEA), Spanish Council of Scientific Research (CSIC), Barcelona, Spain

3GRECO, Institute of Aquatic Ecology, University of Girona, Facultat de Ciències, Girona, Spain

***Corresponding author**

Email: [dpineda@ceab.csic.es](mailto:dpineda@ceab.csic.es)

***Supplementary Information for:***

**Supplementary Texts**

**Text S1.** To assess the reliability of PICRUSt2 predictions, we examined Nearest Sequenced Taxon Index (NSTI) values, which quantify the phylogenetic distance between each amplicon sequence variants (ASV) and its closest sequenced reference genome. Because prediction accuracy decreases with increasing NSTI, lower values indicate stronger phylogenetic support for functional inference. Across all ASVs placed in the PICRUSt2 reference tree (*n* = 22,613), NSTI values exhibited a right-skewed distribution, reflecting the presence of numerous rare taxa with limited genomic representation. ASVs contributing to functional predictions (*n* = 7,494) showed lower NSTI values (median = 0.076; mean = 0.119; IQR = 0.030–0.173; SD = 0.140) than the full ASV dataset (median = 0.106; mean = 0.216). Importantly, the median NSTI of 0.076 indicates that the majority of predicted ASVs were closely related to sequenced reference genomes. According to Djemiel et al. (2022), NSTI values within this range are consistent with robust functional inference, supporting the reliability of PICRUSt2 predictions in our dataset. ASVs included in functional predictions accounted for approximately 97.6% of total community relative abundance, and 93.5% of the predicted functional signal originated from ASVs with NSTI ≤ 0.2. To further evaluate representativeness, Bray-Curtis dissimilarity matrices were calculated using (i) the complete ASV abundance table and (ii) the subset of ASVs contributing to PICRUSt2 predictions. A Mantel test revealed an almost perfect correlation between the two matrices (Spearman *r* = 0.9997, *p* < 0.001), demonstrating that beta-diversity patterns were effectively preserved when analyses were restricted to ASVs with predicted functions.

**Supplementary Tables**

**Table S1**. Physiographic localization of the study sites along the Ter River.

| **Code** | **Site** | **Latitude,**  **N** | **Longitude,**  **E** | **Altitude (m.a.s.l.)** | **Distance to mouth (km)** | **Drainage area (km2)** |
| --- | --- | --- | --- | --- | --- | --- |
| T1 | Setcases | 42°21'26.2" | 2°17'33.7" | 1166 | 190 | 63 |
| T2 | Sant Joan de les Abadesses | 42°13'14.7 | 2°14'26.6" | 714 | 162 | 302 |
| T3 | Ripoll | 42°10'20.0" | 2°11'38.0" | 649 | 153 | 738 |
| T4 | Montesquieu | 42°06'24.0" | 2°12'39.0" | 563 | 142 | 853 |
| T5 | Torelló | 42°03'17.0" | 2°14'39.0" | 503 | 128 | 929 |
| T6 | Manlleu | 41°59'19.8" | 2°16'54.2" | 433 | 112 | 1135 |
| T7 | Roda de Ter | 41°58'55.7" | 2°18'24.3" | 424 | 109 | 1394 |
| T8 | Cellera de Ter | 41°58'07.8" | 2°37'37.2" | 146 | 65 | 1913 |
| T9 | Sant Gregori | 41°58'49.7" | 2°46'00.8" | 75 | 50 | 2080 |
| T10 | Celrà | 42°02'21.9" | 2°51'54.4" | 27 | 37 | 2607 |
| T11 | Sobrànigues | 42°03'34.7" | 2°57'35.0" | 22 | 26 | 2850 |
| T12 | Torroella de Montgrí | 42°01'32.0" | 3°09'07.0" | 2 | 4 | 2950 |

**Table S2**.Investigated genes related to microbial phosphorus (P) cycling with their corresponding KO numbers. Genes indicated by an asterisk had a global relative abundance below 0.01% and were not included in the results. For P cycling, the following multi-subunit systems were considered: including the phosphate transporter system (*pstSCAB*), the *ugp* transporter system (*ugpBAEC*), phosphonate transporter systems (*phnCDE* and *phnSVUT*), and the C-P lyase complex (*phnGHIJKLMNOP*).

| **Gene** | **Description** | **KEGG ID** |
| --- | --- | --- |
| **Phosphorus uptake and transport** | | |
| *pstA* | Phosphate-specific transport system subunit PstA | K02038 |
| *pstB* | Phosphate-specific transport system subunit PstB | K02036 |
| *pstC* | Phosphate-specific transport system subunit PstC | K02037 |
| *pstS* | Phosphate -specific transport system subunit PstS | K02040 |
| *pit* | Phosphate inorganic transporter | K03306 |
| *phnC* | Phosphonate transporter subunit PhnC | K02041 |
| *phnD* | Phosphonate transporter subunit PhnD | K02044 |
| *phnE* | Phosphonate transporter subunit PhnE | K02042 |
| *ugpA* | Glycerol-3-phosphate transporter subunit UgpA | K05814 |
| *ugpB* | Glycerol-3-phosphate transporter subunit UgpB | K05813 |
| *ugpC* | Glycerol-3-phosphate transporter subunit UgpC | K05816 |
| *ugpE* | Glycerol-3-phosphate transporter subunit UgpE | K05815 |
| *glpT* | Glycerol-3-phosphate transporter | K02445 |
| *pgtP** | Phosphoglycerate transporter protein | K11382 |
| *phnS* | 2-aminoethylphosphonate transport system substrate-binding protein | K11081 |
| *phnV* | 2-aminoethylphosphonate transport system permease protein | K11082 |
| *phnU* | 2-aminoethylphosphonate transport system permease protein | K11083 |
| *phnT* | 2-aminoethylphosphonate transport system ATP-binding protein | K11084 |
| **Organic phosphorus mineralization** | | |
| *phoN* | Acid phosphatase (class A) | K09474 |
| *aphA* | Acid phosphatase (class B) | K03788 |
| *olpA* | Acid phosphatase | K01078 |
| *phoA* | Alkaline phosphatase A | K01077 |
| *phoD* | Alkaline phosphatase D | K01113 |
| *phoX* | Alkaline phosphatase X | K07093 |
| *appA* | 4-phytase | K01093 |
| *phy* | 3-phytase | K01083 |
| *opd* | Phosphotriesterase | K07048 |
| *ugpQ* | Glycerophosphoryl diester phosphodiesterase (GDP) | K01126 |
| *phnA* | Phosphonoacetate hydrolase | K06193 |
| *phnG* | Alpha-D-ribose 1-methylphosphonate 5-triphosphate synthase | K06166 |
| *phnH* | Alpha-D-ribose 1-methylphosphonate 5-triphosphate synthase | K06165 |
| *phnI* | Alpha-D-ribose 1-methylphosphonate 5-triphosphate synthase | K06164 |
| *phnJ* | Alpha-D-ribose 1-methylphosphonate 5-phosphate C-P lyase | K06163 |
| *phnK* | Alpha-D-ribose 1-methylphosphonate 5-triphosphate synthase | K05781 |
| *phnL* | Alpha-D-ribose 1-methylphosphonate 5-triphosphate synthase | K05780 |
| *phnM* | Alpha-D-ribose 1-methylphosphonate 5-triphosphate | K06162 |
| *phnN* | Ribose 1,5-bisphosphokinase | K05774 |
| *phnO* | Aminoalkylphosphonate N-acetyltransferase | K09994 |
| *phnP* | Phosphoribosyl 1,2-cyclic phosphate phosphodiesterase | K06167 |
| *phnW* | 2-aminoethylphosphonate-pyruvate transaminase (2APT) | K03430 |
| *phnX* | Phosphonoacetaldehyde hydrolase | K05306 |
| **Phosphorus starvation regulation** | | |
| *phoB* | Phosphate regulon response regulator (PhoB) | K07657 |
| *phoU* | PhoR/PhoB inhibitor protein | K02039 |
| *phoR* | Phosphate regulon sensor histidine kinase (PhoR) | K07636 |
| **Inorganic phosphorus solubilization** | | |
| *gcd* | Quinoprotein glucose dehydrogenase (PQQGDH) | K00117 |
| *ppa* | Inorganic pyrophosphatase | K01507 |
| *ppx* | Exopolyphosphatase | K01524 |

**Table S3**.Investigated genes related to microbial nitrogen (N) cycling with their corresponding KO numbers. Genes indicated by an asterisk had a global relative abundance below 0.01% and were not included in the results. For N cycling, the following multi-subunit systems were considered: glutamate synthase (NADPH, *gltBD*), nitrite reductase (*nirBD*), cytochrome *c* nitrite reductase (*nrfAH*), nitric oxide reductase (*norBC*), assimilatory nitrate reductase (*nasAB*), nitrogenase (*nifHDK*), and ammonia monooxygenase (*amoABC*).

| **Gene** | **Description** | **KEGG ID** |
| --- | --- | --- |
| **Organic nitrogen synthesis** | | |
| *GLT1** | glutamate synthase (NADH) [EC:1.4.1.14] | K00264 |
| *gltB* | glutamate synthase (NADPH) large chain [EC:1.4.1.13] | K00265 |
| *gltD* | glutamate synthase (NADPH) small chain [EC:1.4.1.13] | K00266 |
| *gltS* | glutamate synthase (ferredoxin) [EC:1.4.7.1] | K00284 |
| *glnA* | glutamine synthetase [EC:6.3.1.2] | K01915 |
| **Organic nitrogen degradation** | | |
| *gudB* | Glutamate dehydrogenase [EC:1.4.1.2] | K00260 |
| *GLUD1_2* | Glutamate dehydrogenase (NAD(P)+) [EC:1.4.1.3] | K00261 |
| *gdhA* | Glutamate dehydrogenase (NADP+) [EC:1.4.1.4] | K00262 |
| *GDH2* | Glutamate dehydrogenase [EC:1.4.1.2] | K15371 |
| **Dissimilatory Nitrate Reduction** | | |
| *nirB* | Nitrite reductase (NADH) large subunit | K00362 |
| *nirD* | Nitrite reductase (NADH) small subunit | K00363 |
| *nrfA* | Nitrite reductase (cytochrome c-552) | K03385 |
| *nrfH* | Cytochrome c nitrite reductase small subunit | K15876 |
| **Denitrification** | | |
| *norB* | Nitric oxide reductase subunit B | K04561 |
| *norC* | Nitric oxide reductase subunit C | K02305 |
| *nosZ* | Nitrous-oxide reductase | K00376 |
| **Assimilatory Nitrate Reduction** | | |
| *nasA* | Assimilatory nitrate reductase catalytic subunit | K00372 |
| *nasB* | Assimilatory nitrate reductase electron transfer subunit | K00360 |
| *narB* | Ferredoxin-nitrate reductase | K00367 |
| *nirA* | Ferredoxin-nitrite reductase | K00366 |
| **Nitrogen fixation** | | |
| *anfG** | Nitrogenase delta subunit | K00531 |
| *nifD* | Nitrogenase molybdenum-iron protein alpha chain | K02586 |
| *nifH* | Nitrogenase iron protein | K02588 |
| *nifK* | Nitrogenase molybdenum-iron protein beta chain | K02591 |
| **Nitrification** | | |
| *amoA* | Ammonia monooxygenase subunit A | K28504 |
| *amoB* | Hydrazine synthase subunit | K10945 |
| *amoC* | Hydrazine dehydrogenase | K10946 |
| *hao* | Methane/ammonia monooxygenase subunit B | K10535 |

**Table S4**.Mean and standard deviation of physical and chemical characteristics at each sampling site and date. Variables are: pH, dissolved oxygen (DO), dissolved oxygen saturation (DOsat), water temperature (T), electrical conductivity (EC), concentrations of total phosphorus (TP), total dissolved phosphorus (TDP), dissolved organic phosphorus (DOP), soluble reactive phosphorus (SRP), total dissolved nitrogen (TDN), ammonium (NH4+), nitrite (NO2–), nitrate (NO3–), and dissolved organic carbon (DOC). Sampling site codes are defined in Table S1 caption. Sampling date codes: November 2020 (Nov. 2020), March 2021 (Mar. 2021), June-July 2021 (Jun. 2021), and September 2021 (Sep. 2021).

|  | **pH** | **DO**  **(mg L–1)** | **DOsat (%)** | **T**  **(ºC)** | **EC**  **(μS cm–1)** | **TP**  **(μg P L–1)** | **TDP**  **(μg P L–1)** | **DOP**  **(μg P L–1)** | **SRP**  **(μg P L–1)** | **TDN**  **(mg N L–1)** | **NH4+**  **(μg N L–1)** | **NO2–**  **(μg N L–1)** | **NO3–**  **(mg N L–1)** | **DOC**  **(mg C L–1)** |
| --- | --- | --- | --- | --- | --- | --- | --- | --- | --- | --- | --- | --- | --- | --- |
| T1 | 8.1 ± 0.1 | 9.0 ± 1.0 | 81 ± 8 | 10.8 ± 3.8 | 110 ± 10 | 68.2 ± 15.6 | 31.7 ± 6.2 | 6.5 ± 5.5 | 25.2 ± 11.0 | 0.5 ± 0.1 | 15.2 ± 10.2 | 2.5 ± 1.5 | 0.44 ± 0.10 | 1.5 ± 1.2 |
| T2 | 8.5 ± 0.2 | 10.5 ± 2.9 | 97 ± 22 | 12.8 ± 5.0 | 293 ± 21 | 59.1 ± 18.4 | 26.4 ± 7.8 | 4.2 ± 5.1 | 22.2 ± 12.2 | 0.8 ± 0.3 | 70.9 ± 67.3 | 16.3 ± 8.7 | 0.68 ± 0.28 | 2.0 ± 1.5 |
| T3 | 8.5 ± 0.3 | 10.3 ± 1.7 | 96 ± 8 | 12.9 ± 4.8 | 343 ± 20 | 40.3 ± 14.7 | 17.0 ± 5.9 | 7.1 ± 8.6 | 9.9 ± 3.9 | 0.6 ± 0.2 | 9.7 ± 4.1 | 8.2 ± 3.1 | 0.46 ± 0.10 | 1.7 ± 1.4 |
| T4 | 8.5 ± 0.3 | 10.2 ± 1.5 | 98 ± 7 | 14.0 ± 4.9 | 363 ± 28 | 60.6 ± 32.5 | 25.1 ± 11.3 | 5.3 ± 5.9 | 19.7 ± 13.5 | 0.7 ± 0.2 | 20.9 ± 19.3 | 8.6 ± 6.2 | 0.67 ± 0.21 | 2.7 ± 1.3 |
| T5 | 8.5 ± 0.1 | 10.1 ± 1.9 | 97 ± 10 | 14.5 ± 6.1 | 363 ± 28 | 51.3 ± 18.6 | 19.5 ± 4.8 | 7.5 ± 5.7 | 12.0 ± 7.2 | 0.5 ± 0.1 | 22.2 ± 12.3 | 6.7 ± 2.6 | 0.45 ± 0.06 | 1.9 ± 0.9 |
| T6 | 8.5 ± 0.1 | 10.0 ± 1.4 | 99 ± 7 | 15.8 ± 7.2 | 398 ± 31 | 74.3 ± 13.9 | 26.2 ± 5.7 | 14.7 ± 6.4 | 11.5 ± 4.0 | 1.1 ± 0.3 | 25.5 ± 17.4 | 14.2 ± 2.9 | 0.95 ± 0.31 | 2.9 ± 1.5 |
| T7 | 8.3 ± 0.2 | 9.0 ± 1.7 | 89 ± 9 | 16.0 ± 8.1 | 468 ± 47 | 141.8 ± 47.3 | 48.7 ± 16.2 | 16.1 ± 11.2 | 32.6 ± 5.2 | 1.7 ± 0.7 | 101.7 ± 40.3 | 54.5 ± 36.0 | 1.48 ± 0.70 | 2.8 ± 1.4 |
| T8 | 8.1 ± 0.3 | 9.5 ± 0.8 | 90 ± 6 | 13.4 ± 3.0 | 447 ± 25 | 89.3 ± 19.2 | 38.1 ± 11.3 | 12.7 ± 8.2 | 25.5 ± 7.4 | 2.0 ± 0.5 | 14.6 ± 5.8 | 10.3 ± 3.0 | 1.88 ± 0.57 | 3.1 ± 1.1 |
| T9 | 7.8 ± 0.4 | 9.8 ± 0.7 | 98 ± 8 | 16.0 ± 2.2 | 511 ± 29 | 89.5 ± 11.3 | 40.1 ± 6.2 | 17.6 ± 11.4 | 22.5 ± 11.7 | 2.0 ± 0.4 | 61.6 ± 11.8 | 16.3 ± 2.3 | 1.82 ± 0.37 | 2.9 ± 0.8 |
| T10 | 8.1 ± 0.1 | 8.8 ± 0.8 | 94 ± 9 | 18.5 ± 3.5 | 565 ± 14 | 167.7 ± 19.3 | 68.4 ± 11.1 | 26.2 ± 16.3 | 42.3 ± 25.4 | 2.2 ± 0.4 | 71.3 ± 42.9 | 33.0 ± 8.0 | 2.01 ± 0.40 | 3.5 ± 1.0 |
| T11 | 8.0 ± 0.1 | 8.6 ± 1.0 | 91 ± 8 | 17.9 ± 3.2 | 678 ± 32 | 250.1 ± 47.2 | 117.1 ± 25.4 | 30.7 ± 16.6 | 86.4 ± 28.5 | 2.5 ± 0.3 | 186.0 ± 72.9 | 63.7 ± 14.4 | 2.02 ± 0.26 | 3.0 ± 0.9 |
| T12 | 8.1 ± 0.1 | 8.4 ± 1.5 | 90 ± 9 | 19.6 ± 5.4 | 673 ± 59 | 253.8 ± 67.8 | 112.2 ± 29.4 | 26.0 ± 15.4 | 86.2 ± 37.6 | 2.4 ± 0.4 | 91.6 ± 61.5 | 41.2 ± 20.7 | 2.17 ± 0.27 | 3.0 ± 1.0 |
| Nov. 2020 | 8.2 ± 0.3 | 10.8 ± 1.6 | 101 ± 11 | 12.7 ± 3.3 | 424 ± 172 | 99.9 ± 64.6 | 42.2 ± 25.0 | 19.1 ± 9.3 | 23.1 ± 17.9 | 1.3 ± 1.0 | 50.1 ± 74.7 | 20.5 ± 23.6 | 1.06 ± 0.77 | 2.2 ± 0.9 |
| Mar. 2021 | 8.4 ± 0.4 | 9.9 ± 0.8 | 89 ± 7 | 10.8 ± 2.9 | 456 ± 172 | 95.5 ± 72.3 | 43.7 ± 34.3 | 15.0 ± 14.8 | 28.7 ± 21.8 | 1.5 ± 0.8 | 67.5 ± 73.7 | 25.0 ± 23.3 | 1.37 ± 0.81 | 1.3 ± 0.6 |
| Jun. 2021 | 8.3 ± 0.2 | 7.8 ± 0.6 | 85 ± 6 | 20.1 ± 4.4 | 414 ± 156 | 126.5 ± 86.1 | 51.6 ± 41.6 | 18.1 ± 15.4 | 33.5 ± 30.5 | 1.3 ± 0.7 | 49.3 ± 31.4 | 19.6 ± 13.2 | 1.15 ± 0.70 | 3.1 ± 0.8 |
| Sep. 2021 | 8.1 ± 0.2 | 9.5 ± 0.9 | 98 ± 7 | 17.1 ± 3.7 | 443 ± 148 | 126.7 ± 90.0 | 52.7 ± 41.8 | 6.1 ± 5.7 | 46.7 ± 41.7 | 1.6 ± 0.8 | 63.5 ± 58.5 | 26.7 ± 30.2 | 1.43 ± 0.76 | 3.8 ± 0.7 |

**Table S5**.Permutational multivariate analysis of variance (PERMANOVA) results for microbial community composition, and phosphorus (P) and nitrogen (N) functional genes composition based on Bray-Curtis dissimilarities. Three complementary models were used to disentangle spatial, temporal, and cobble side effects on community composition and functional gene composition. Reported values correspond to marginal effects based on 999 permutations; *R2* indicates the proportion of variance explained by each term, *F* values represent pseudo-F statistics, and p-values indicate statistical significance. Significant effects (*p* < 0.05) are shown in bold.

| Microbial community composition | | | | | Microbial P-gene composition | | | | Microbial N-gene composition | | | | |
| --- | --- | --- | --- | --- | --- | --- | --- | --- | --- | --- | --- | --- | --- |
| Model 1: Site + Time | | | | | | | | | | | | | |
| Term | Df | *R2* | *F* | p-value | Df | *R2* | *F* | p-value | Df | *R2* | *F* | p-value |
| Site | 11 | 0.317 | 4.10 | **0.001** | 11 | 0.324 | 3.61 | **0.001** | 11 | 0.323 | 3.81 | **0.001** |
| Time | 3 | 0.118 | 5.58 | **0.001** | 3 | 0.087 | 2.89 | **0.001** | 3 | 0.061 | 1.97 | **0.043** |
| Model 2: Site × Time + Cobble side | | | | | | | | | | | | | |
| Term | Df | *R2* | *F* | p-value | Df | *R2* | *F* | p-value | Df | *R2* | *F* | p-value |
| Site × Time | 33 | 0.335 | 2.29 | **0.001** | 33 | 0.275 | 1.44 | **0.040** | 33 | 0.270 | 1.34 | 0.084 |
| Cobble side | 1 | 0.023 | 5.23 | **0.001** | 1 | 0.051 | 8.75 | **0.001** | 1 | 0.068 | 11.25 | **0.001** |
| Model 3: Cobble side × Site + Cobble side × Time | | | | | | | | | | | | | |
| Term | Df | *R2* | *F* | p-value | Df | *R2* | *F* | p-value | Df | *R2* | *F* | p-value |
| Cobble side × Site | 11 | 0.059 | 0.65 | 0.999 | 11 | 0.065 | 0.85 | 0.718 | 11 | 0.052 | 0.68 | 0.891 |
| Cobble side × Time | 3 | 0.014 | 0.75 | 0.999 | 3 | 0.022 | 1.04 | 0.413 | 3 | 0.039 | 1.85 | 0.071 |

**Table S6**.Spearman rank correlations between predicted phosphorus (P) and nitrogen (N) cycling processes and selected physical and chemical variables in light-side and dark-side biofilms. Correlation coefficients (*ρ*) and Benjamini-Hochberg (BH) adjusted p-values are shown for each process-variable combination. Significant associations after BH correction (*p* < 0.05) are indicated in bold. Variable abbreviations are defined in Table S4.

|  |  | pH | | DOsat | | T | | SRP | | DOP | | DOC | | NH4+ | | NO3– | |
| --- | --- | --- | --- | --- | --- | --- | --- | --- | --- | --- | --- | --- | --- | --- | --- | --- | --- |
| Side | Process | *ρ* | p-value | *ρ* | p-value | *ρ* | p-value | *ρ* | p-value | *ρ* | p-value | *ρ* | p-value | *ρ* | p-value | *ρ* | p-value |
| Light | P mineralization | 0.000 | 0.998 | -0.040 | 0.812 | -0.237 | 0.223 | -0.194 | 0.285 | -0.107 | 0.538 | -0.457 | **0.018** | -0.196 | 0.285 | -0.421 | **0.030** |
| P uptake | 0.194 | 0.285 | -0.262 | 0.179 | -0.296 | 0.120 | -0.306 | 0.120 | -0.174 | 0.331 | -0.297 | 0.120 | -0.204 | 0.285 | -0.262 | 0.179 |
| P regulation | -0.309 | 0.120 | 0.233 | 0.223 | 0.124 | 0.477 | 0.337 | 0.120 | 0.307 | 0.120 | 0.327 | 0.120 | 0.234 | 0.223 | 0.470 | **0.018** |
| P solubilization | -0.306 | 0.120 | 0.144 | 0.435 | 0.137 | 0.436 | 0.179 | 0.326 | 0.047 | 0.799 | 0.213 | 0.275 | -0.075 | 0.675 | 0.141 | 0.435 |
| Dark | P mineralization | -0.025 | 0.927 | -0.128 | 0.546 | -0.262 | 0.186 | -0.230 | 0.272 | -0.058 | 0.799 | -0.386 | 0.051 | -0.269 | 0.180 | -0.435 | **0.036** |
| P uptake | 0.159 | 0.510 | -0.278 | 0.171 | -0.359 | 0.061 | -0.221 | 0.276 | -0.034 | 0.904 | -0.363 | 0.061 | -0.143 | 0.512 | -0.082 | 0.717 |
| P regulation | -0.295 | 0.141 | 0.406 | 0.051 | 0.081 | 0.717 | 0.130 | 0.546 | 0.183 | 0.410 | 0.383 | 0.051 | 0.077 | 0.717 | 0.303 | 0.138 |
| P solubilization | -0.439 | **0.036** | 0.149 | 0.512 | 0.144 | 0.512 | 0.220 | 0.276 | 0.007 | 0.992 | 0.348 | 0.066 | -0.001 | 0.993 | 0.113 | 0.601 |
| Light | N synthesis | 0.081 | 0.697 | -0.147 | 0.491 | -0.313 | 0.136 | -0.009 | 0.960 | 0.187 | 0.409 | -0.151 | 0.490 | 0.062 | 0.757 | 0.232 | 0.303 |
| N degradation | 0.086 | 0.697 | 0.372 | 0.087 | 0.325 | 0.136 | 0.037 | 0.865 | 0.178 | 0.439 | 0.329 | 0.136 | 0.227 | 0.306 | 0.116 | 0.576 |
| DNRA | 0.121 | 0.570 | 0.112 | 0.585 | -0.171 | 0.443 | -0.275 | 0.220 | -0.377 | 0.087 | -0.283 | 0.205 | -0.325 | 0.136 | -0.568 | **0.001** |
| ANRA | -0.070 | 0.728 | -0.007 | 0.960 | -0.135 | 0.530 | -0.171 | 0.443 | -0.256 | 0.261 | -0.152 | 0.490 | -0.214 | 0.317 | -0.362 | 0.091 |
| Denitrification | 0.221 | 0.306 | 0.018 | 0.938 | -0.120 | 0.570 | 0.034 | 0.867 | 0.071 | 0.728 | 0.081 | 0.697 | 0.210 | 0.317 | 0.249 | 0.265 |
| N fixation | -0.085 | 0.697 | 0.222 | 0.306 | 0.381 | 0.087 | 0.311 | 0.136 | 0.210 | 0.317 | 0.474 | **0.019** | 0.390 | 0.087 | 0.248 | 0.265 |
| Nitrification | -0.045 | 0.834 | 0.314 | 0.136 | 0.160 | 0.472 | 0.145 | 0.491 | 0.259 | 0.261 | 0.122 | 0.570 | 0.231 | 0.303 | 0.160 | 0.472 |
| Dark | N synthesis | 0.001 | 0.997 | -0.143 | 0.588 | -0.228 | 0.274 | -0.009 | 0.994 | 0.102 | 0.718 | -0.126 | 0.674 | 0.001 | 0.997 | 0.259 | 0.220 |
| N degradation | -0.098 | 0.718 | 0.346 | 0.083 | 0.283 | 0.181 | 0.165 | 0.498 | 0.066 | 0.821 | 0.359 | 0.077 | 0.200 | 0.371 | 0.115 | 0.718 |
| DNRA | 0.104 | 0.718 | 0.077 | 0.806 | -0.020 | 0.994 | -0.087 | 0.765 | -0.361 | 0.077 | 0.009 | 0.994 | -0.099 | 0.718 | -0.429 | **0.025** |
| ANRA | -0.067 | 0.821 | -0.172 | 0.478 | -0.238 | 0.266 | -0.148 | 0.582 | 0.008 | 0.994 | -0.237 | 0.266 | -0.215 | 0.315 | -0.245 | 0.260 |
| Denitrification | 0.278 | 0.181 | 0.008 | 0.994 | -0.183 | 0.436 | 0.017 | 0.994 | -0.108 | 0.718 | -0.056 | 0.843 | 0.110 | 0.718 | 0.230 | 0.274 |
| N fixation | -0.066 | 0.821 | 0.357 | 0.077 | 0.494 | **0.008** | 0.309 | 0.131 | 0.261 | 0.220 | 0.527 | **0.005** | 0.470 | **0.012** | 0.383 | 0.063 |
| Nitrification | -0.056 | 0.843 | 0.308 | 0.131 | 0.317 | 0.129 | 0.279 | 0.181 | -0.018 | 0.994 | 0.430 | **0.025** | 0.519 | **0.005** | 0.344 | 0.083 |

**Supplementary Figures**

**Figure S1**.(**a**) Location of the Ter River catchment (dark gray) within Catalonia (light gray). (**b**) Map of the Ter River and its drainage catchment showing the twelve sampling sites (orange circles), reservoir locations (white circles), and main tributaries (blue lines). Land-use distribution within the catchment is also shown: forested areas (green), agricultural land (yellow), urban areas (gray), and water bodies (blue). (**c**) Representative photographs of biofilms from the upper surface of cobbles exposed to light (left) and from the underside of cobbles (right).


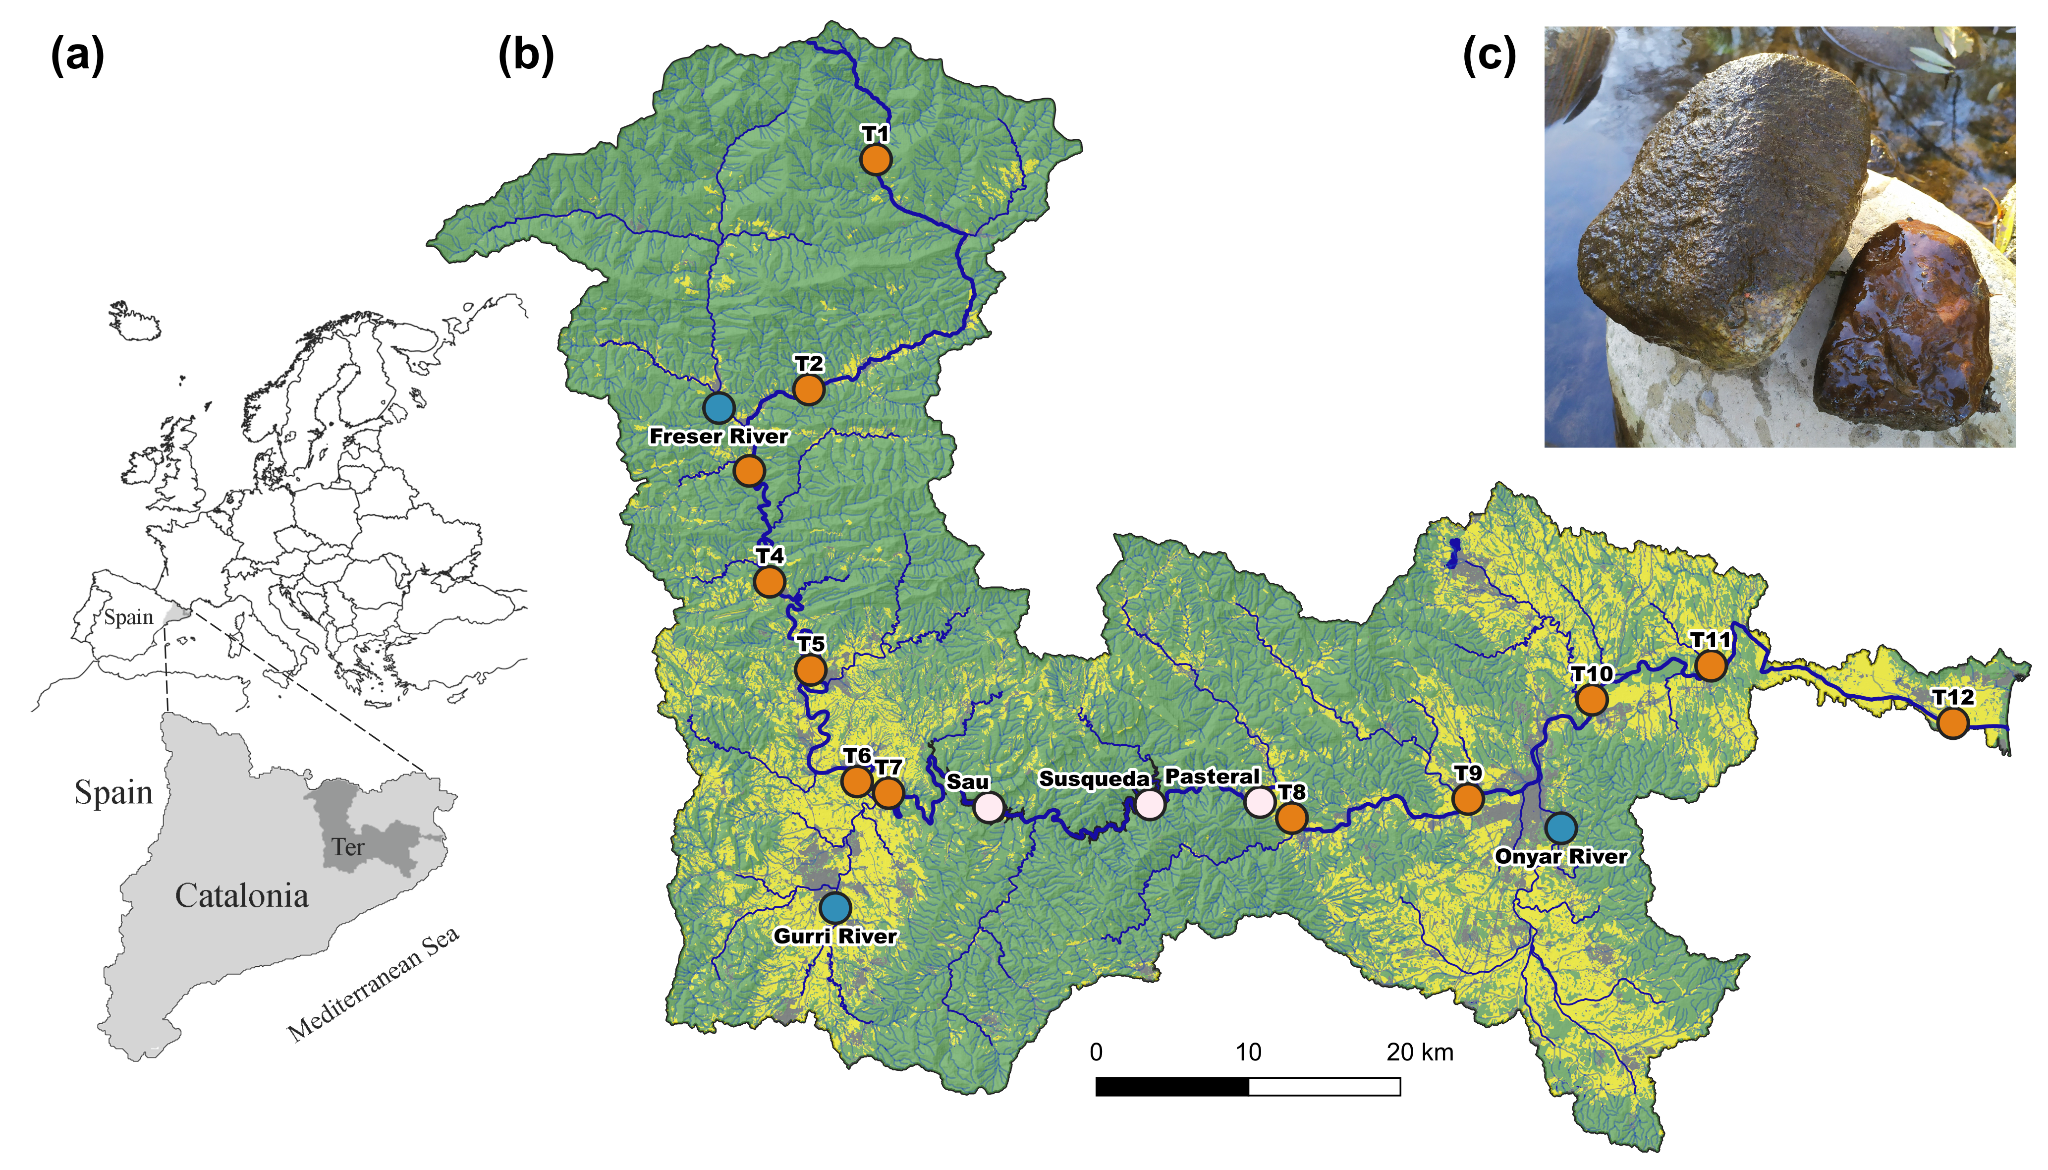


**Figure S2**.Principal component analysis (PCA) of physical and chemical variables across twelve sampling sites along the Ter River and four sampling dates. Points are colored by site and shaped by sampling date. Variables with strong loadings (|loading| > 0.7) on PC1 included EC, TP, TDP, SRP, TDN, NH4+, NO2−, and NO3−, indicating a gradient associated with conductivity and nutrient concentrations, whereas DO and DOsat loaded strongly on PC2. Sampling site codes and variable abbreviations are provided in Tables S1 and S4, respectively.

**
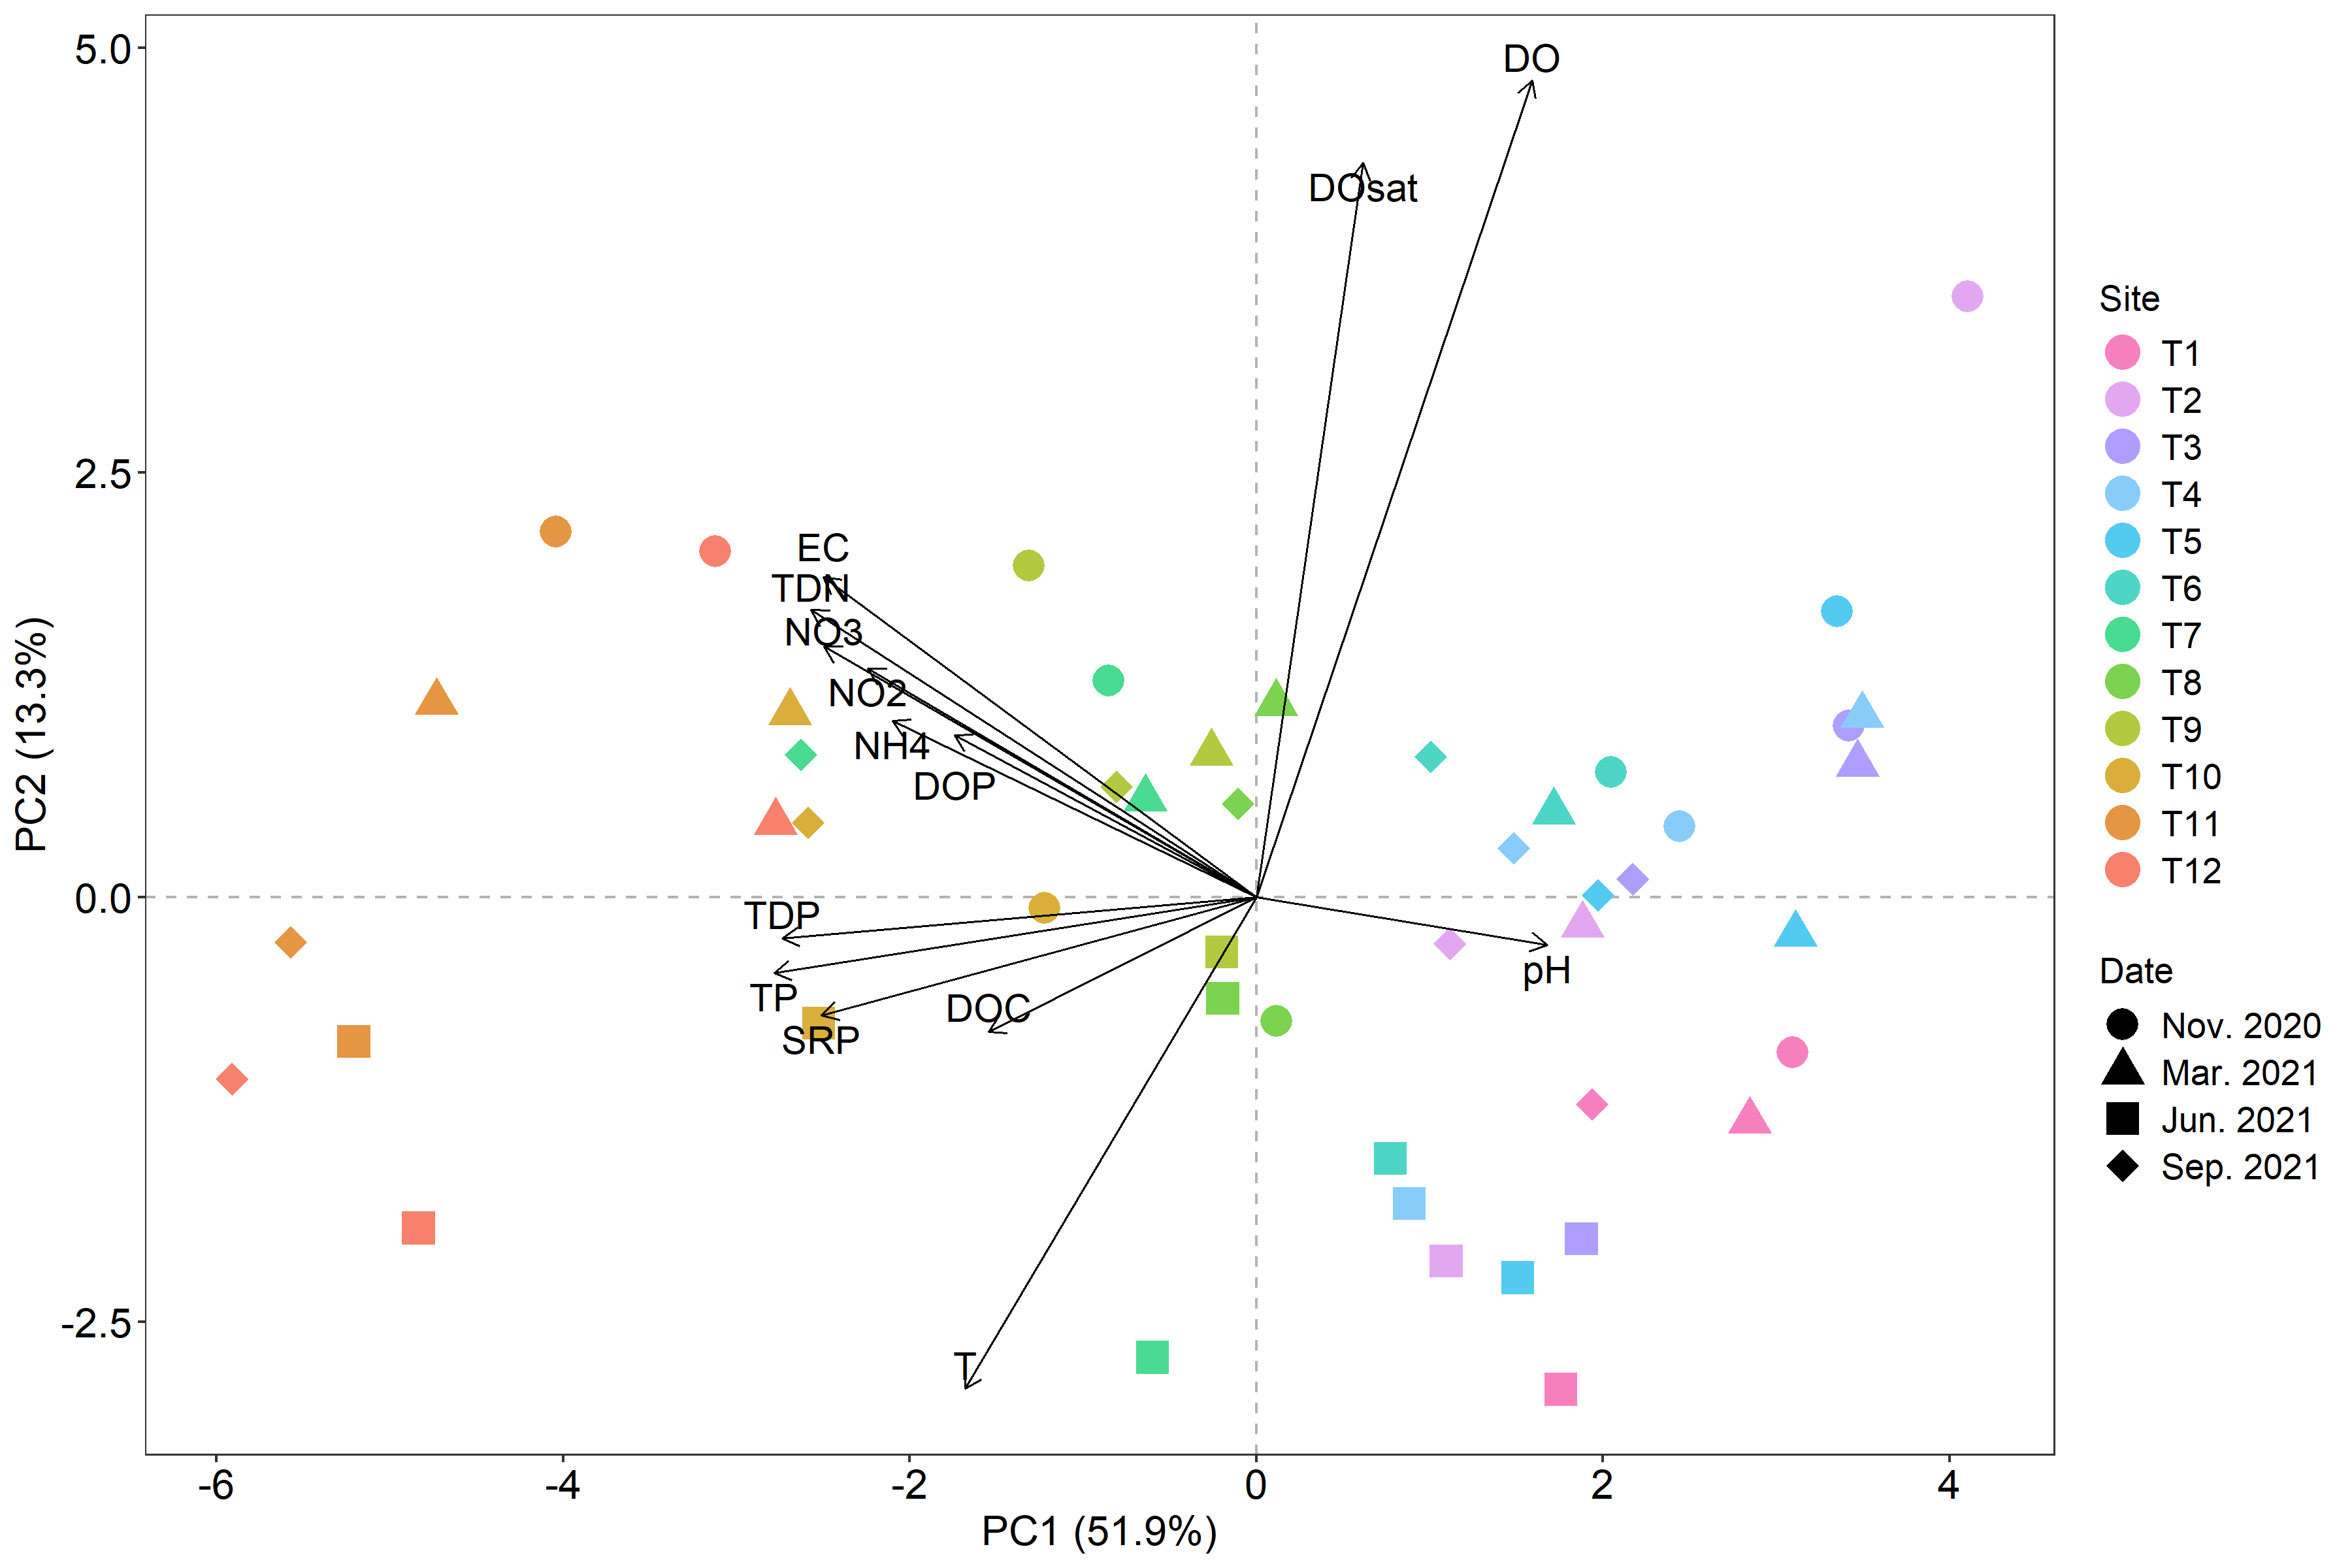
**

**Figure S3**.Relative abundance of dominant bacterial phyla along the Ter River and across the four sampling dates for light-side (**a**) and dark-side biofilms (**b**). Sites are ordered from headwaters (T1) to river mouth (T12) from left to right. Colors denote the ten most abundant phyla calculated separately for light-side and dark-side biofilms, ordered from highest to lowest mean relative abundance in the legend; all remaining phyla are grouped as “Other”. The dark-side biofilm sample from T8 in September 2021 was excluded from analysis due to insufficient sequencing depth. Sampling site codes are defined in Table S1.


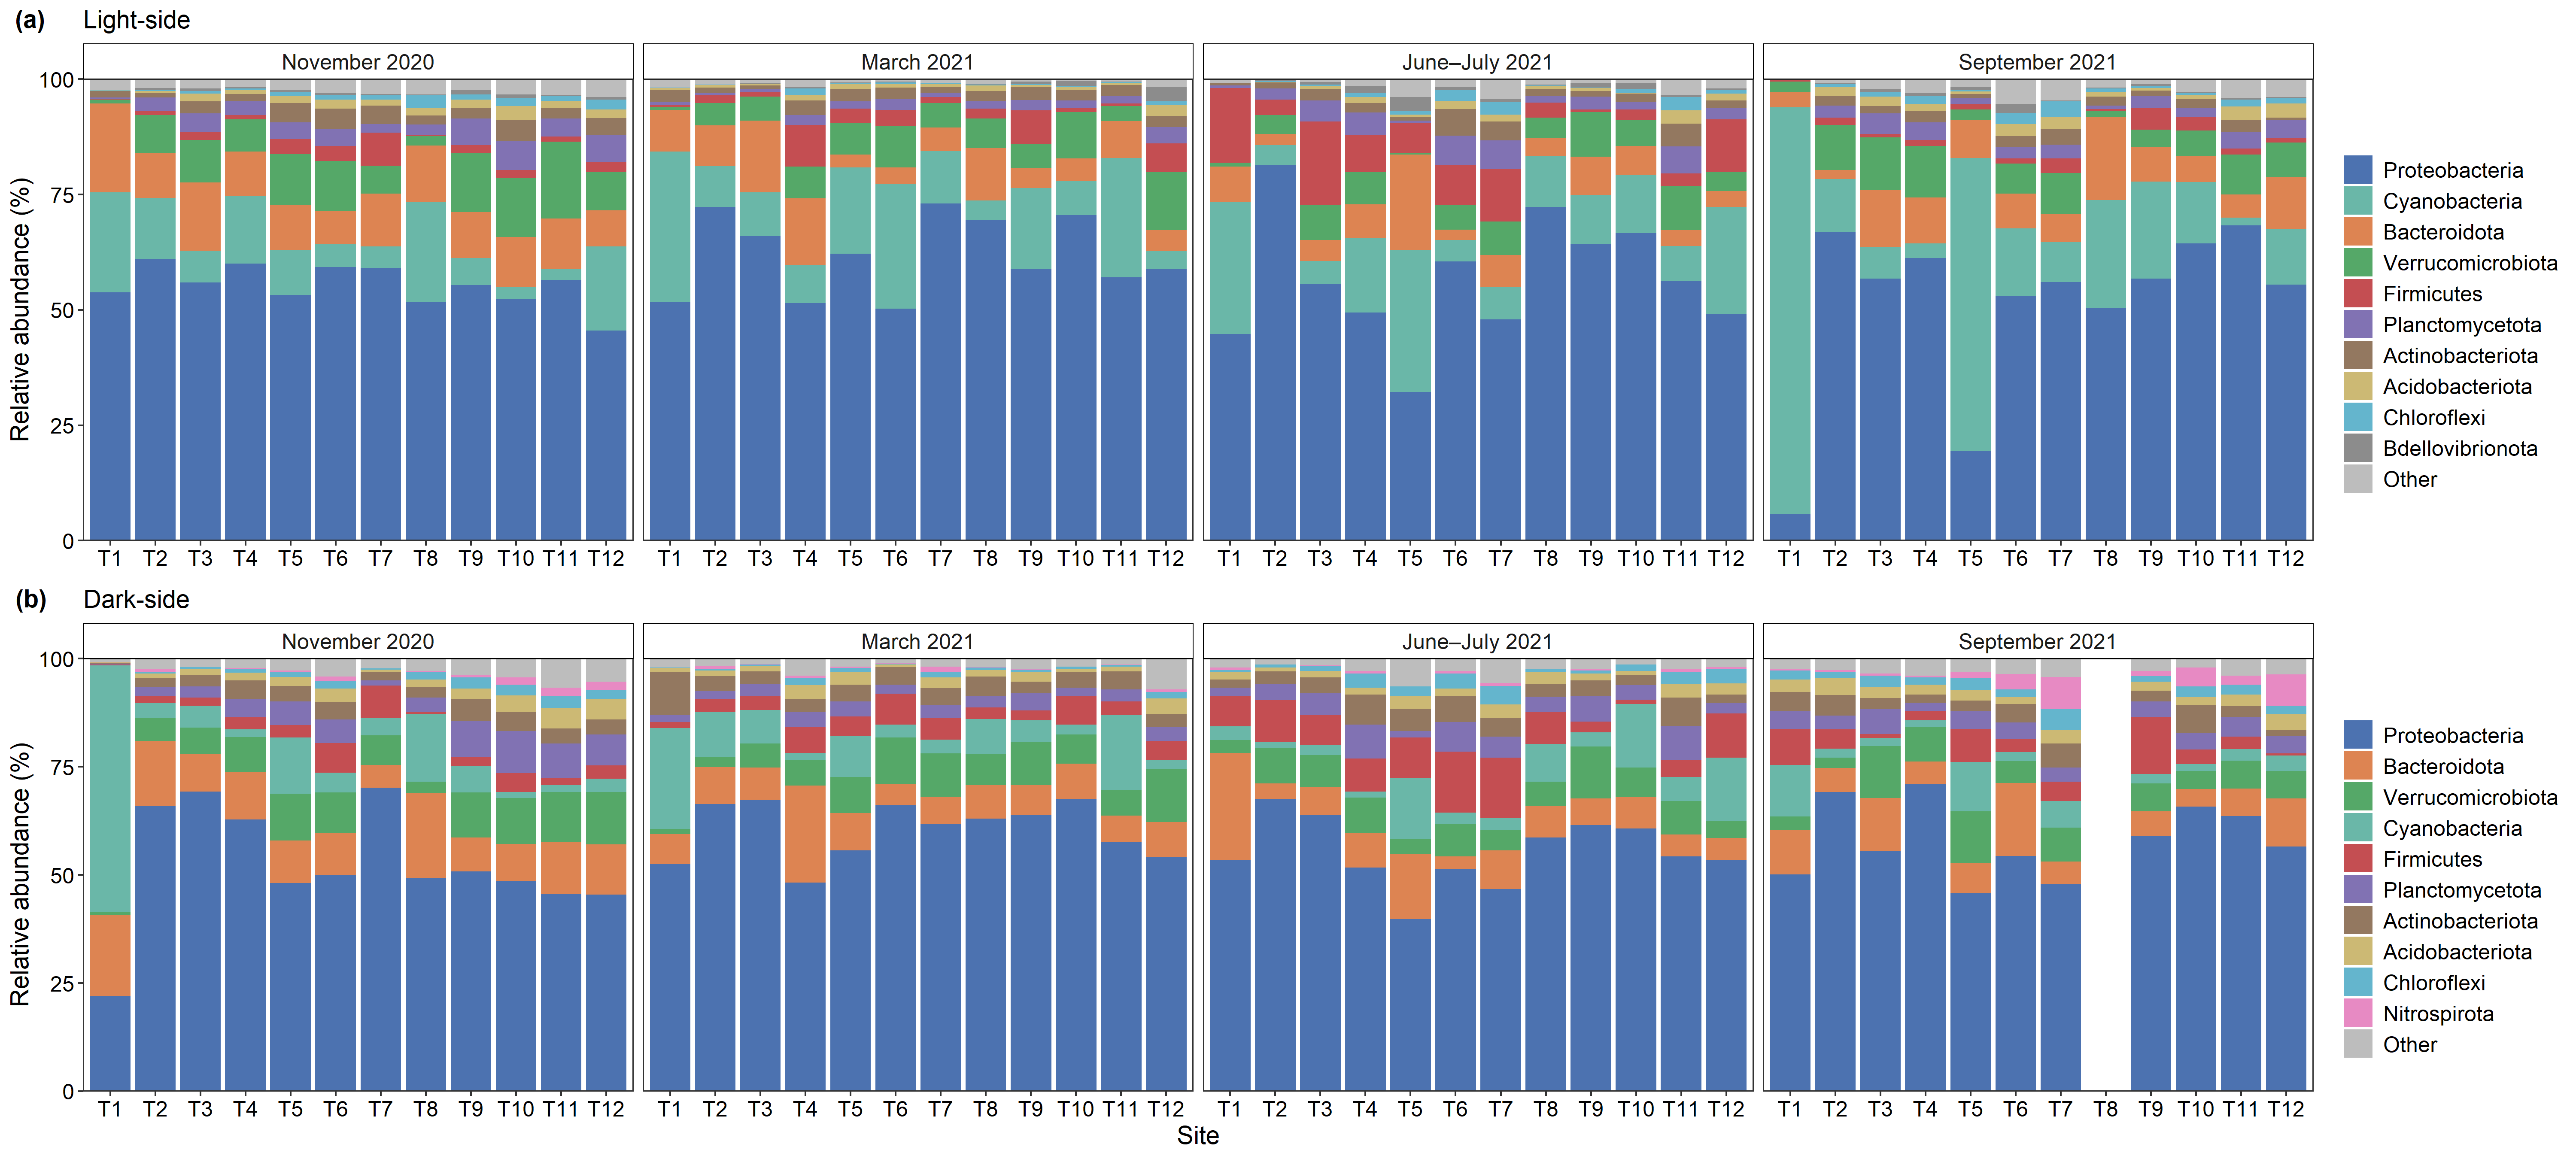


**Figure S4**.Prevalence patterns of global-core ASVs exhibiting side-specific core status. Heatmaps show the prevalence (%) of ASVs that met the pooled core criterion (relative abundance > 0.0001 in ≥50% of all samples) but fell below the 50% prevalence threshold within one cobble side. The upper panel shows ASVs classified as core in light-side biofilms but not in dark-side biofilms, whereas the lower panel shows ASVs classified as core in dark-side biofilms but not in light-side biofilms. Prevalence was calculated separately for light and dark samples across three detection thresholds (0.0001, 0.0010, and 0.0100 relative abundance). Taxonomic affiliation (Class, Order, Family, and Genus when available) is indicated for each ASV. All ASVs shown were detected on both cobble sides but met the core prevalence threshold in only one cobble side. The complete table of ASVs, including full taxonomic annotation and prevalence statistics, is provided in the Figshare repository associated with this study.


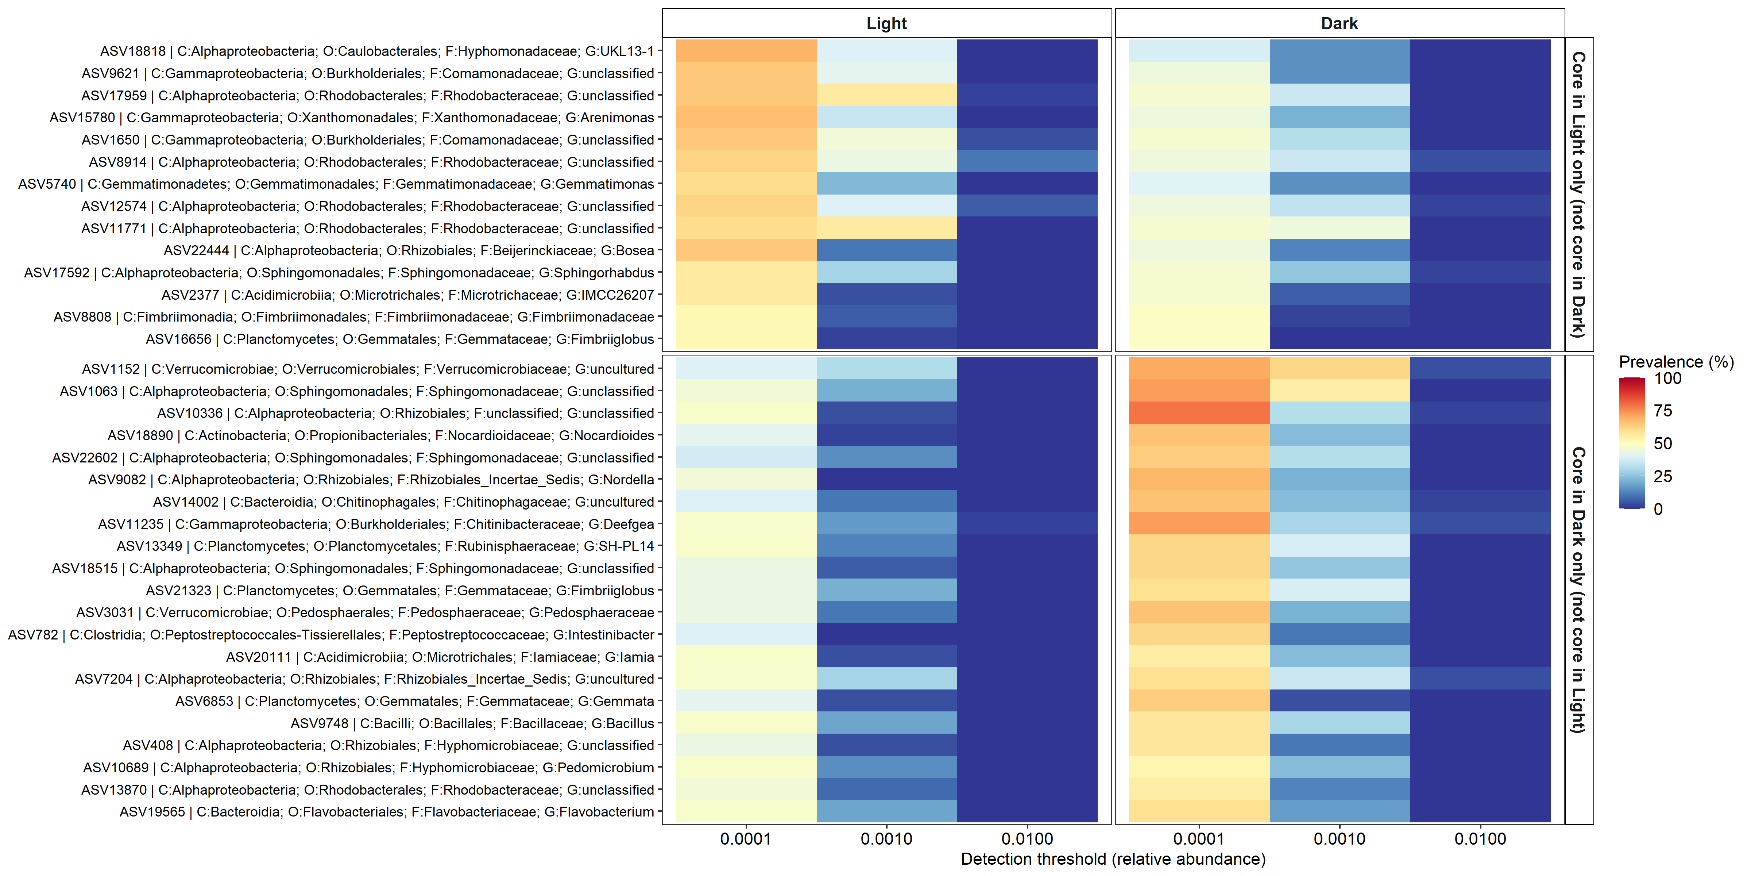


**Figure S5**.Mean relative abundance of phosphorus- (P, **a**) and nitrogen- (N, **b**) cycling functional genes in light-side and dark-side biofilms. Relative abundances (%) are expressed as the proportion of each functional gene (including multi-subunit gene systems) relative to the total predicted KO metagenome generated by PICRUSt2 and were not renormalized within P- or N-cycling gene pools. Accordingly, stacked bars do not sum to 1. Stacked bars representing spatial variation show means across four sampling dates, whereas stacked bars representing temporal variation show means across twelve sites. Bar height reflects the overall contribution of P- or N-cycling genes to the predicted metagenome, while colors denote functional processes, with different shades representing genes within each process. The correspondence between genes and processes is provided in Tables S2 and S3 for P- and N-cycling genes, respectively. Sampling site codes are defined in Table S1.


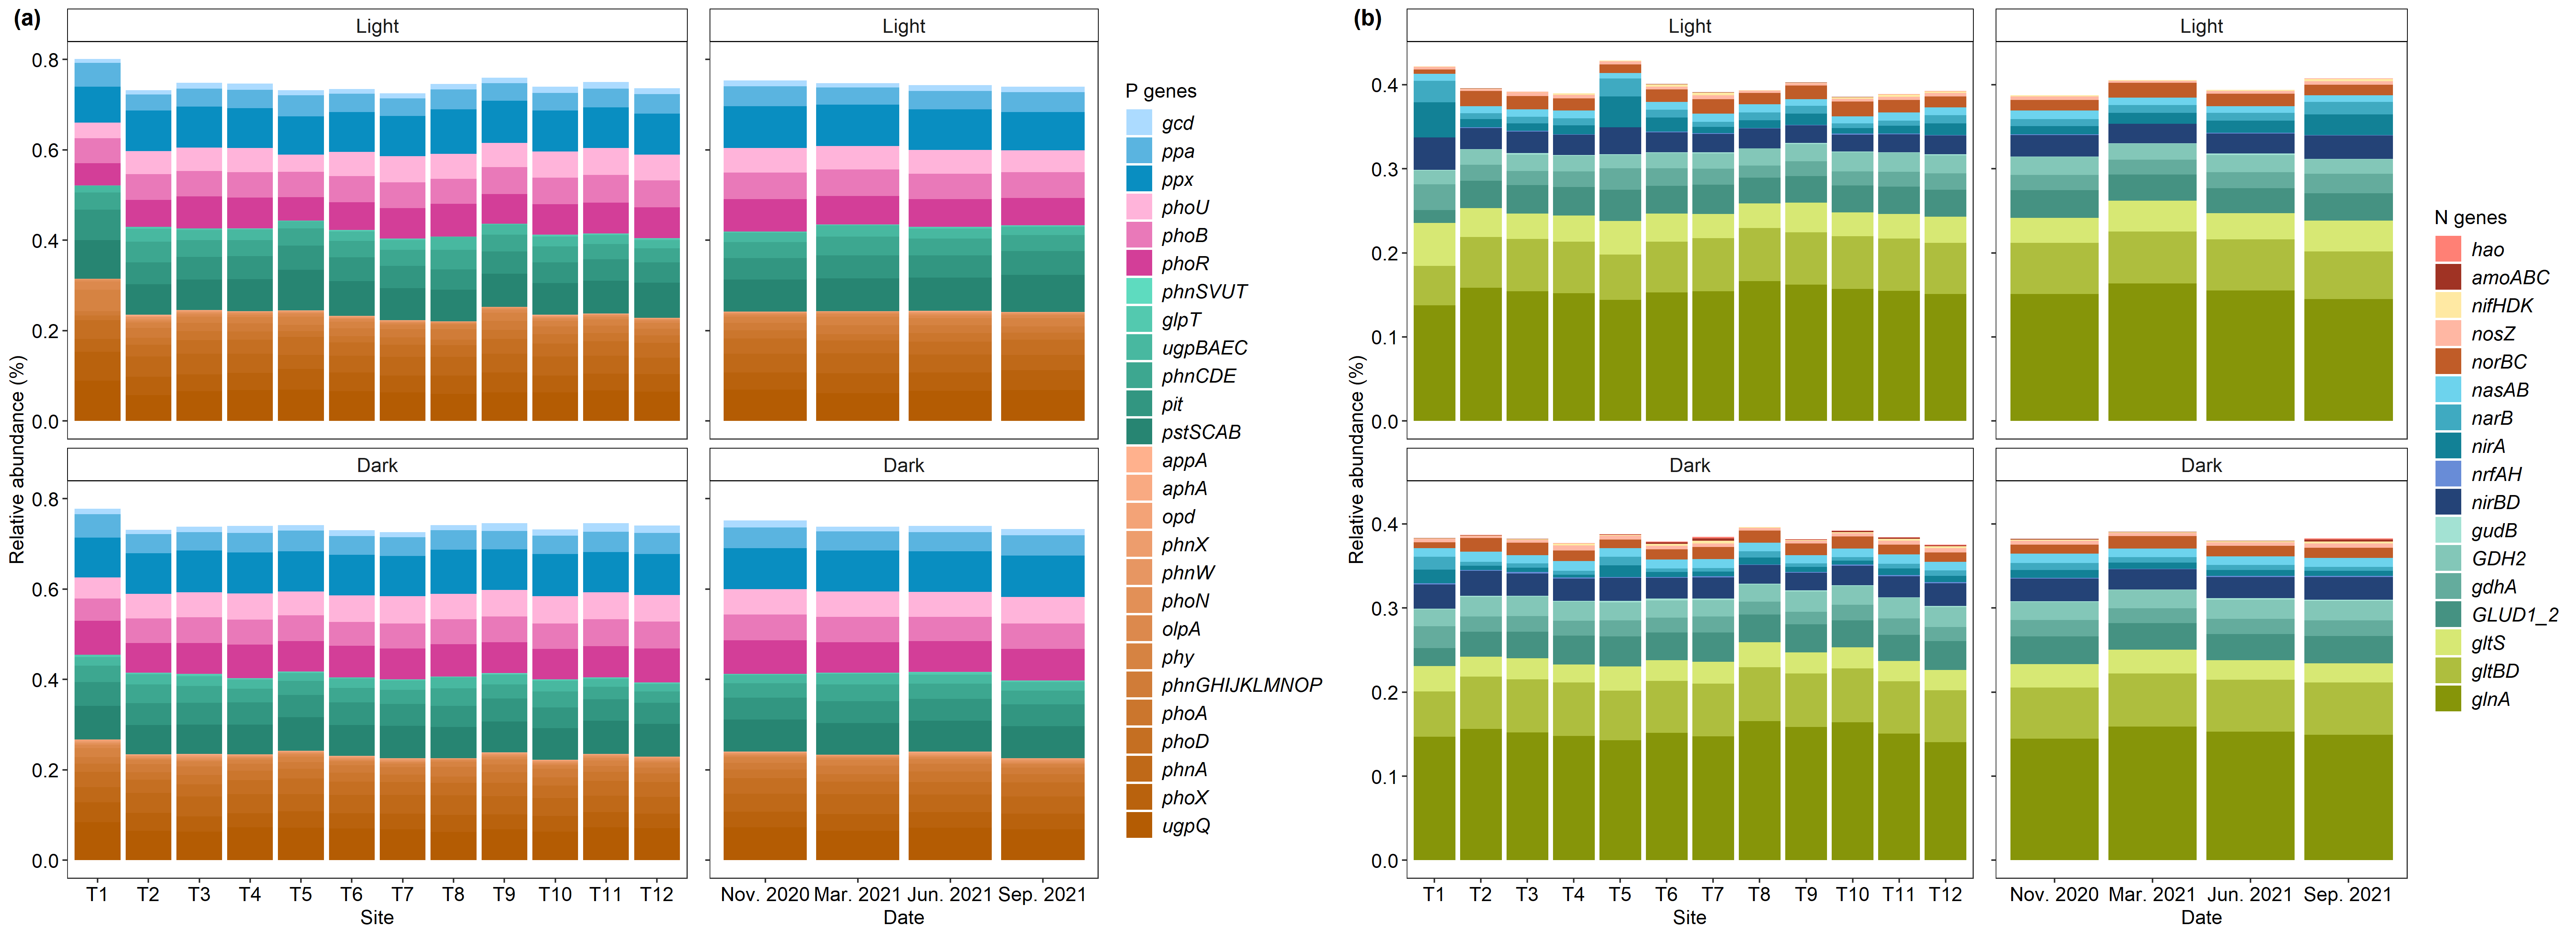


**Figure S6**.Non-metric multidimensional scaling (NMDS) ordination of microbial potential functional gene composition for phosphorus-(P, **a**) and nitrogen-(N, **b**) cycling genes across twelve sampling sites along the Ter River and four sampling dates. NMDS scores are shown in separate panels for each sampling date. Colors denote sampling sites, which are defined in Table S1. Ordinations are based on Bray-Curtis dissimilarities computed from Hellinger-transformed relative abundances of functional genes. Points represent individual samples from the light-side (circles) and dark-side (triangles) biofilms. Sampling site codes are defined in Table S1.


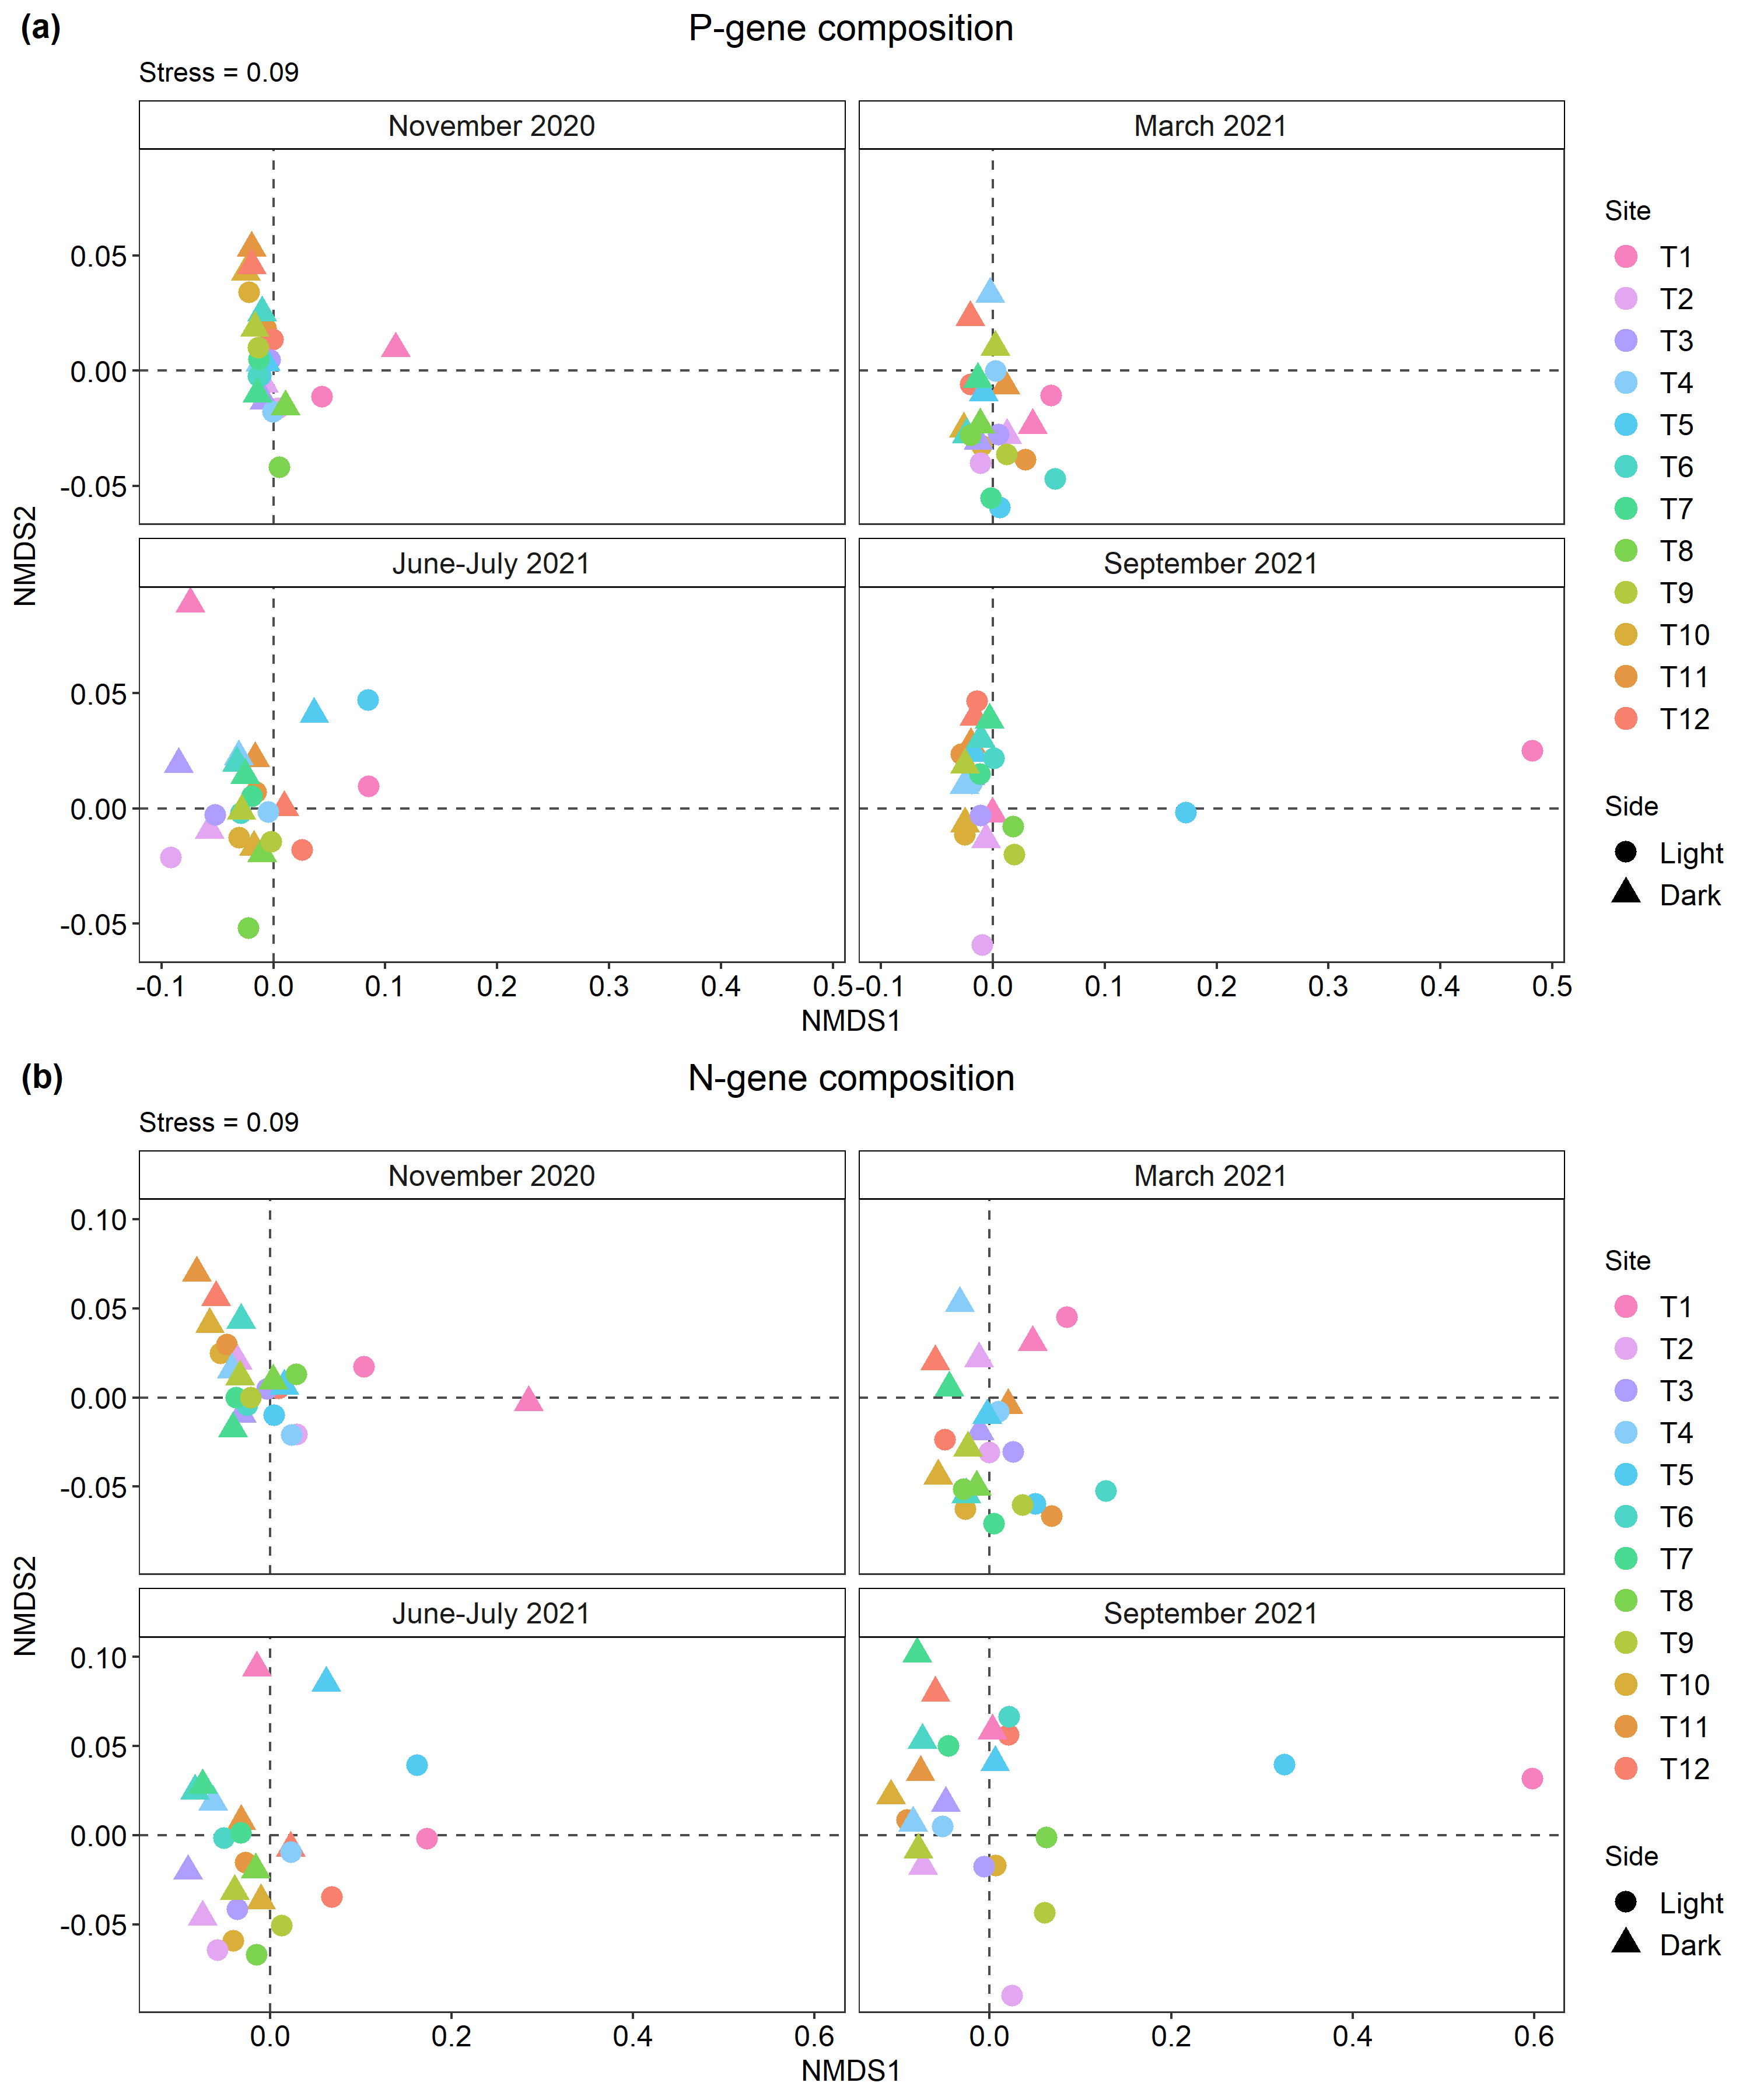


**Figure S7**. Distance-based redundancy analysis (db-RDA) of microbial community composition (**a**, **d**), functional phosphorus (P)-gene composition (**b**, **e**), and nitrogen (N)-gene composition (**c**, **f**) in relation to physical and chemical variables for light-side (upper panels) and dark-side (lower panels) biofilms. Points represent individual samples, colored by site and shaped by sampling date. Arrows indicate variables that were significant (*p* < 0.05) in the db-RDA models based on permutation tests (999 permutations) using marginal tests in which each variable was evaluated while controlling for all other variables in the model. Percentages on the axes denote the proportion of constrained (fitted) and total variation explained by each db-RDA axis. Variable abbreviations are provided in Table S4.


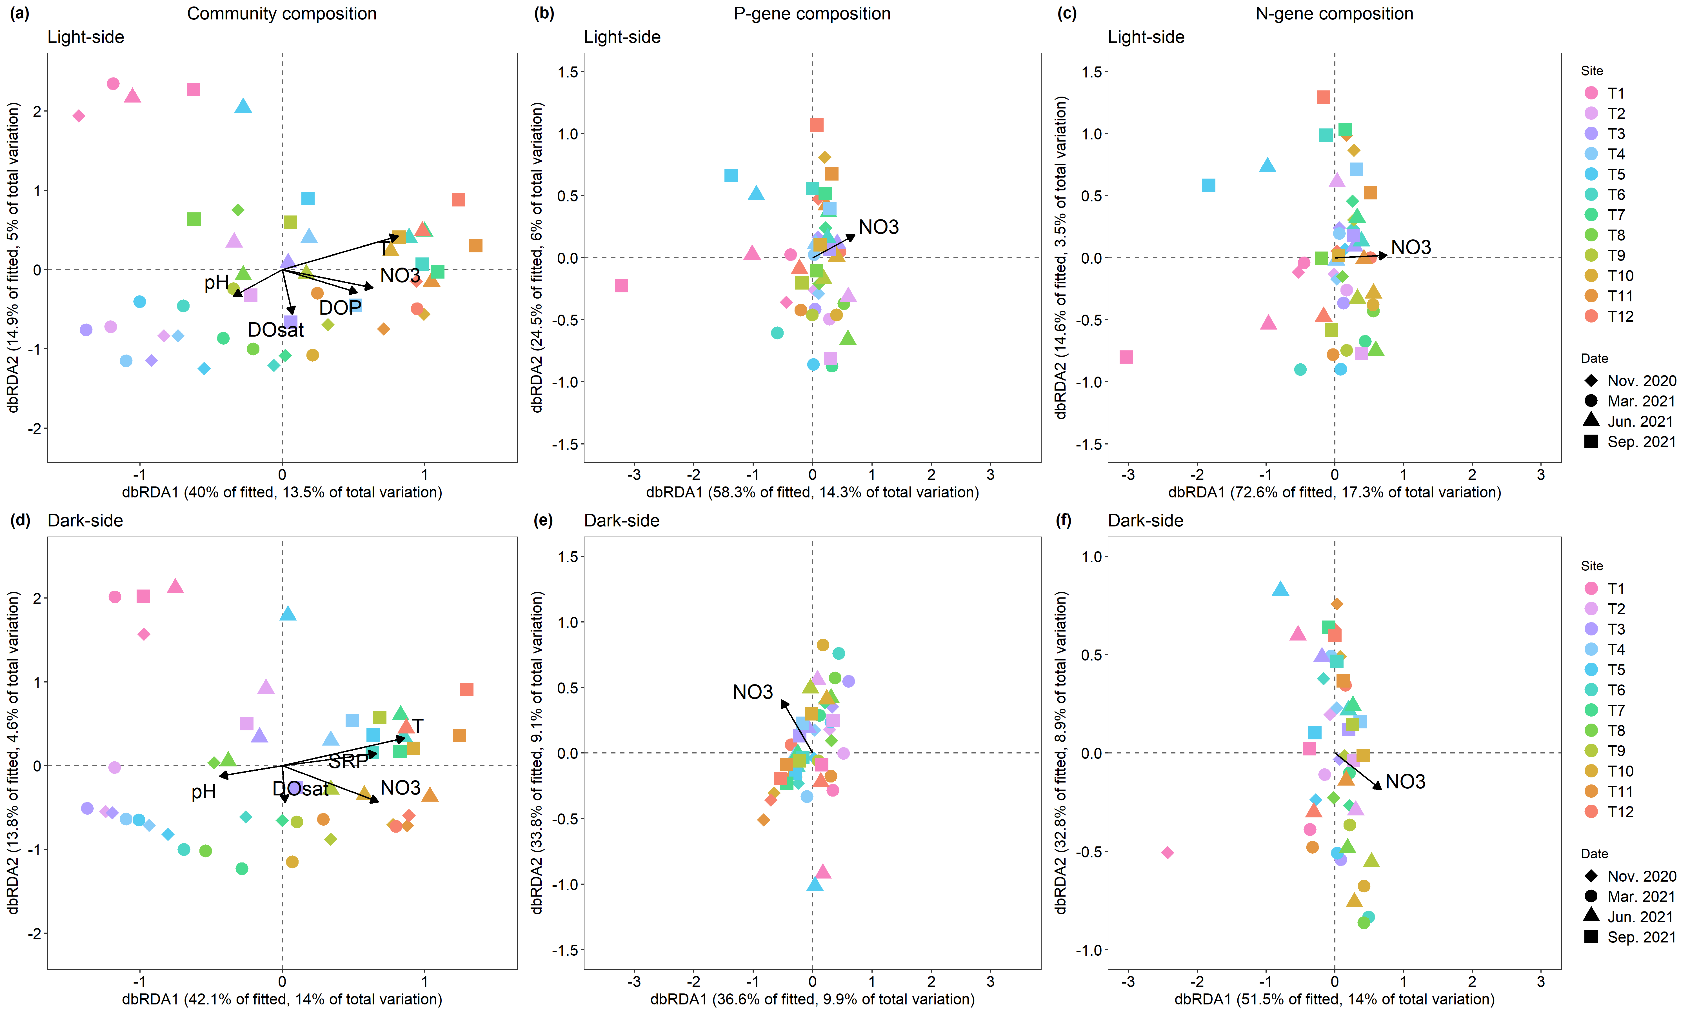


**Figure S8**.Relationships between taxonomic and functional Bray-Curtis dissimilarities in light- and dark-side biofilms for P-cycling genes (**a**) and N-cycling genes (**b**). Points represent pairwise comparisons between samples within each cobble side. Solid lines show multiple regression on distance matrices (MRM) fits describing the relationship between functional and taxonomic dissimilarity, with slopes estimated separately for light- and dark-side biofilms. P-values associated with each MRM model were < 0.001. The p-values shown in each panel correspond to paired permutation tests comparing slopes between light- and dark-side biofilms.


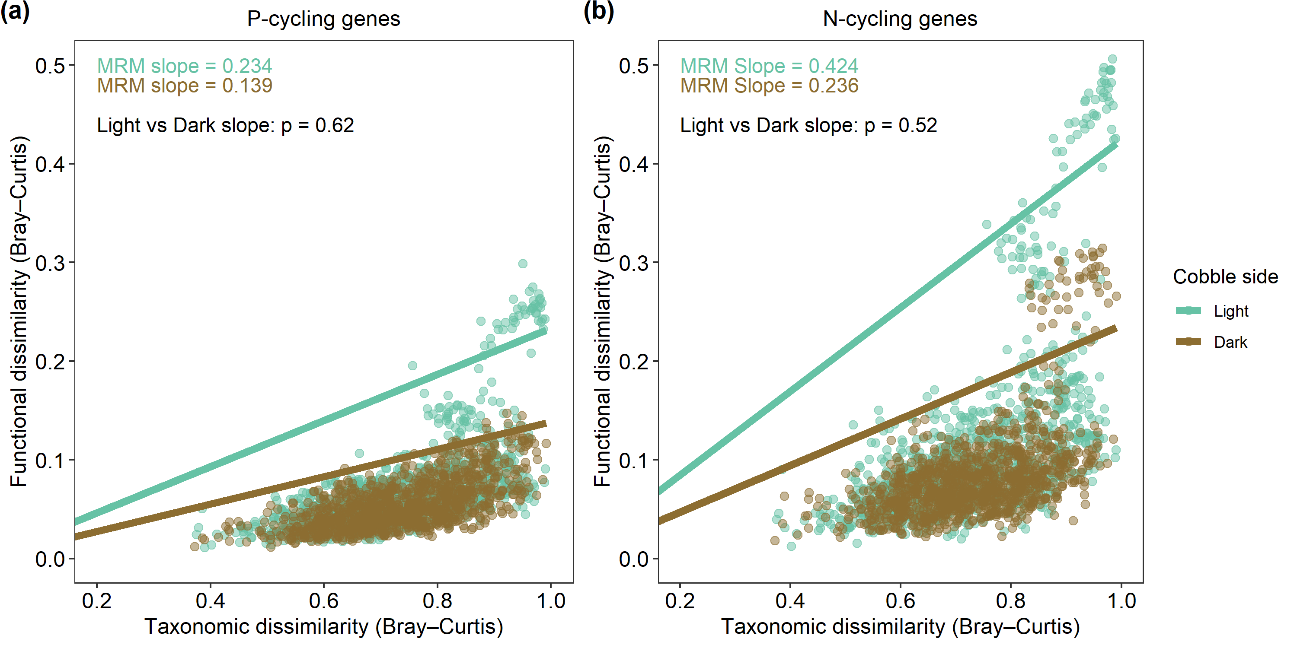


**References**

Djemiel C, Maron PA, Terrat S, Dequiedt S, Cottin A, Ranjard L (2022) Inferring Microbiota Functions from Taxonomic Genes: a Review. GigaScience 11: giab090. <https://doi.org/10.1093/gigascience/giab090>
